# Supplementary material for: The Phosphatomes of the Multicellular Myxobacteria Myxococcus xanthus and Sorangium cellulosum in Comparison with Other Prokaryotic Genomes
Source: PubMed Central journal article supplement (PMC2887360; doi:10.1371/journal.pone.0011164), 2010-06-17

Figure S2: multiple sequence alignment of mycobacterial proteins assigned to COG2208

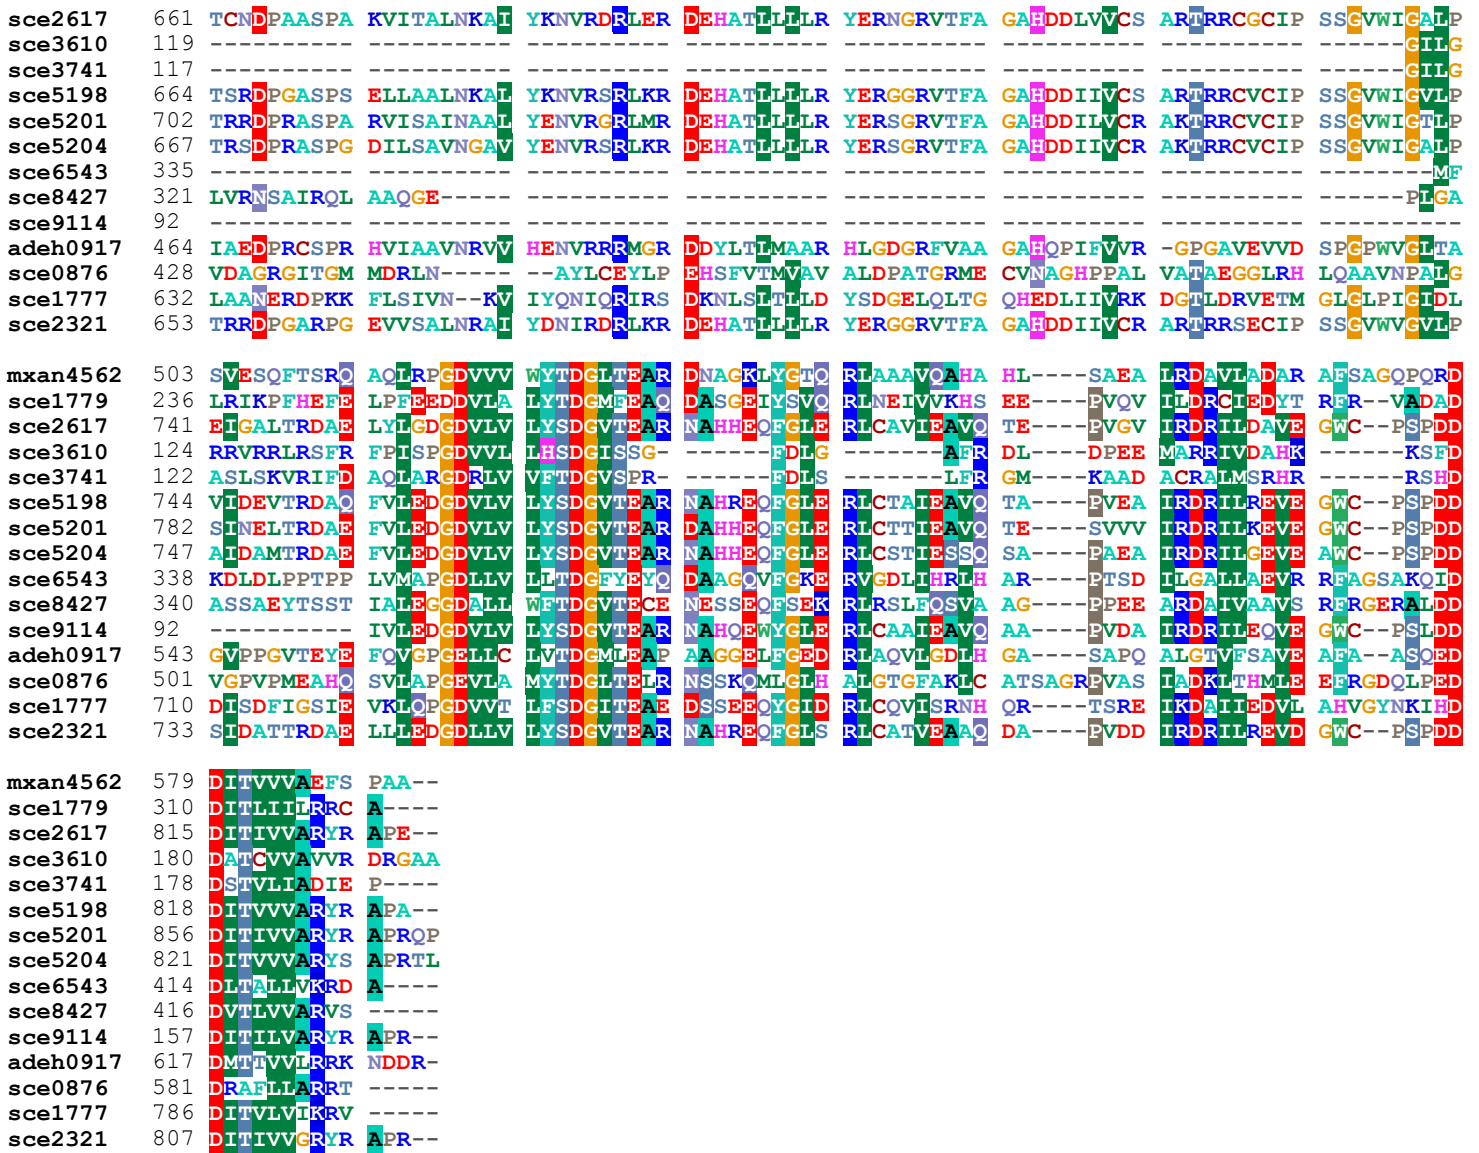

Supplement: pone.0011164.s002.pdf [file pone.0011164.s002.pdf]
